# Supplementary material for: Correction: Mononuclear-macrophages but not neutrophils act as major infiltrating anti-leptospiral phagocytes during leptospirosis
Source: PubMed Central journal article supplement (PMC10501628; doi:10.1371/journal.pone.0291717), 2023-09-14
Supplement: pone.0291717.s002.pdf [file pone.0291717.s002.pdf]

**Triplicate image data for each Figure 6A panel (image data of CD11b<sup>+</sup> mononuclear-macrophages and Ly6G<sup>+</sup> neutrophils infiltration)**

**The image data of CD11b<sup>+</sup> mononuclear-macrophages infiltration**

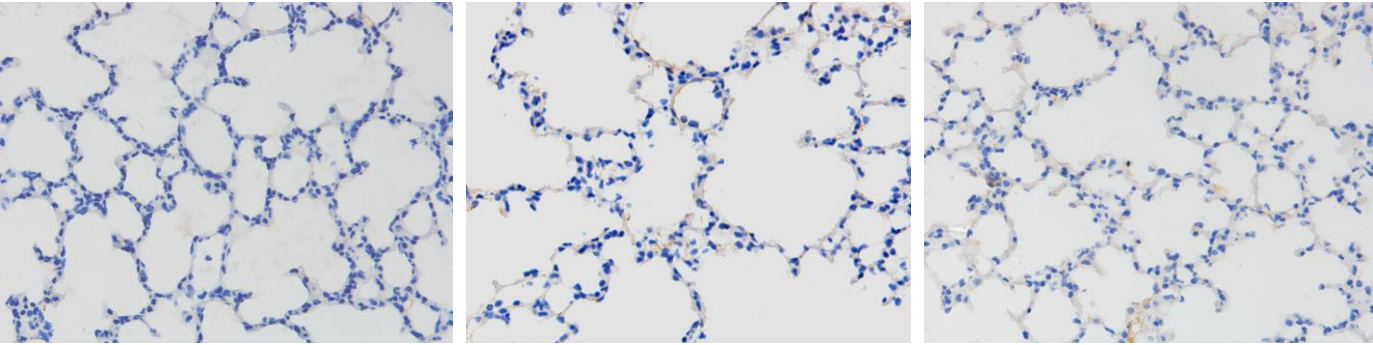

Test 1

Test 2

Test 3

---

**Normal lung tissue**

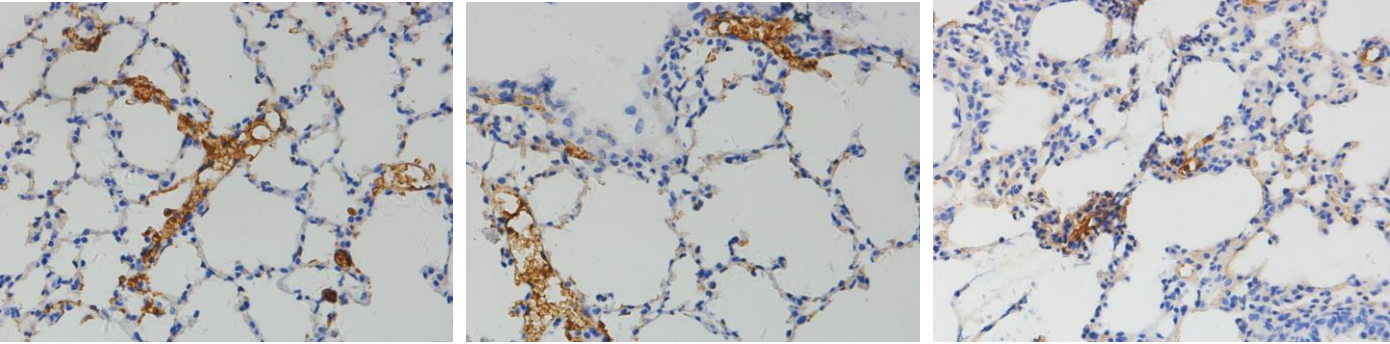

Test 1

Test 2

Test 3

---

**Lung tissue for 3 days infection**

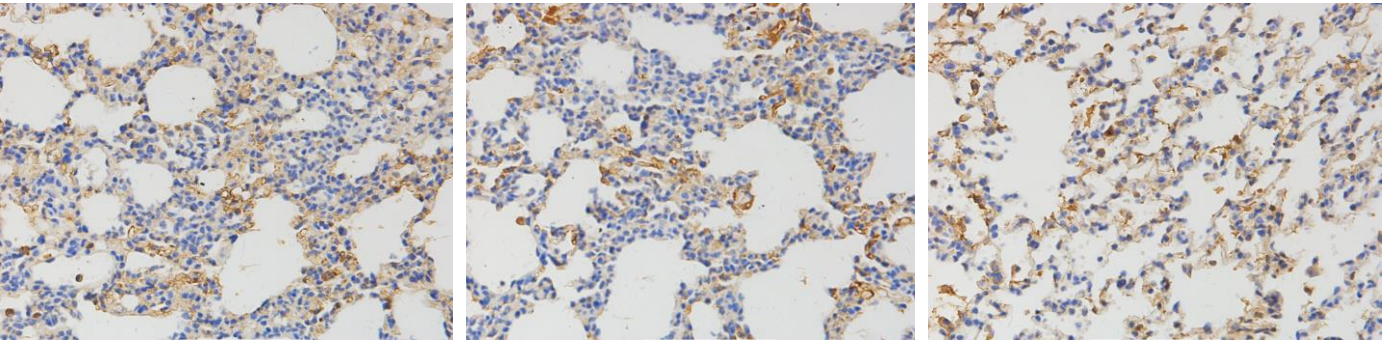

Test 1

Test 2

Test 3

---

**Lung tissue for 5 days infection**

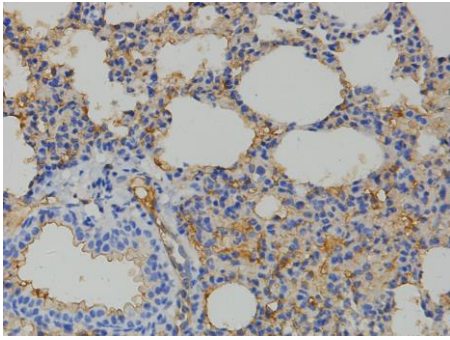

Test 1

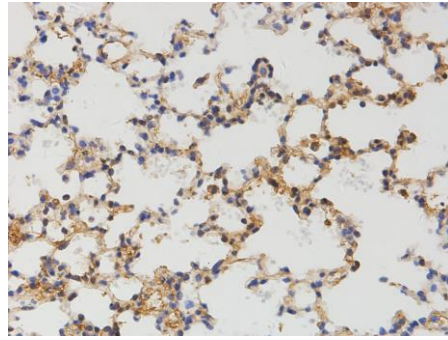

Test 2

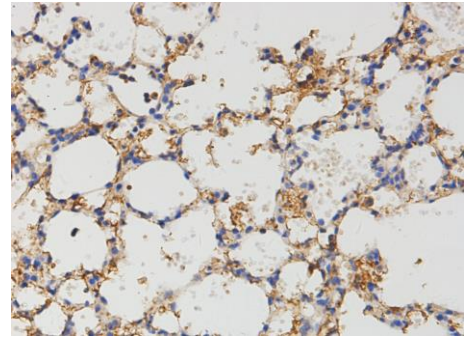

Test 3

---

**Lung tissue for 7 days infection**

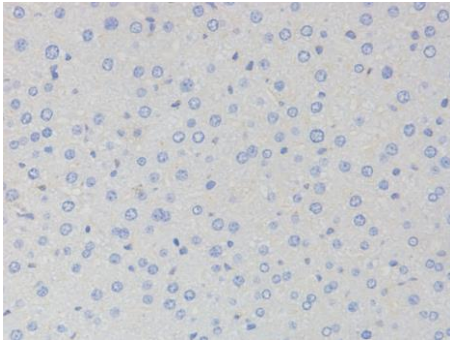

Test 1

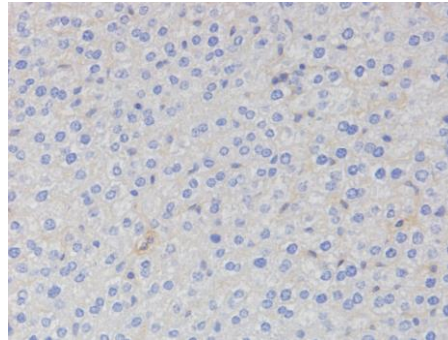

Test 2

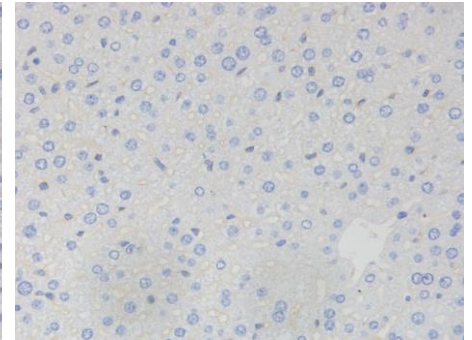

Test 2

---

**Normal liver tissue**

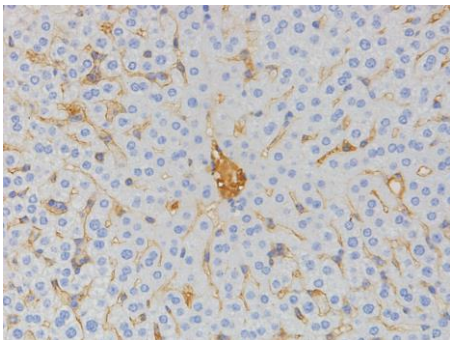

Test 1

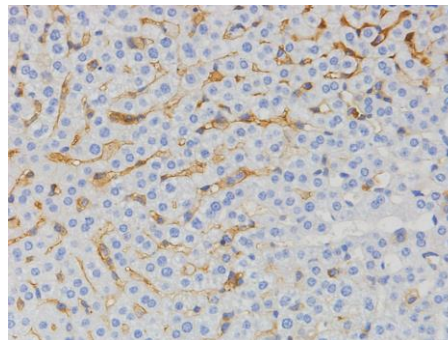

Test 2

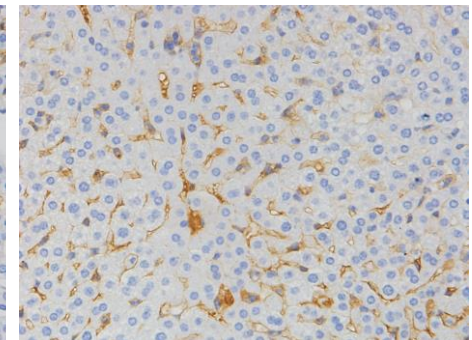

Test 3

---

**Liver tissue for 3 days infection**

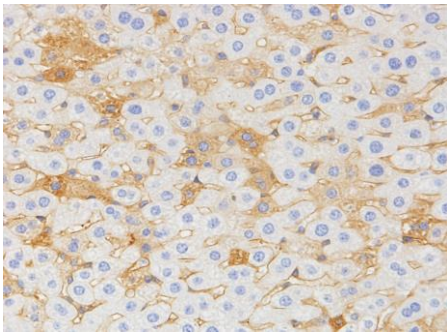

Test 1

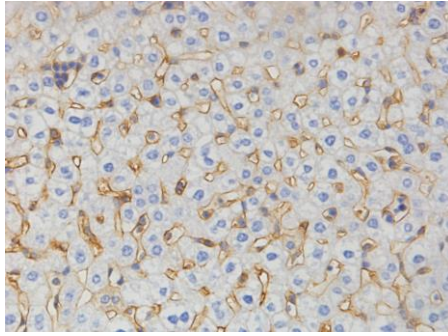

Test 2

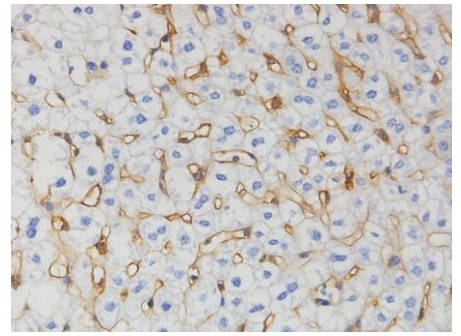

Test 3

---

**Liver tissue for 5 days infection**

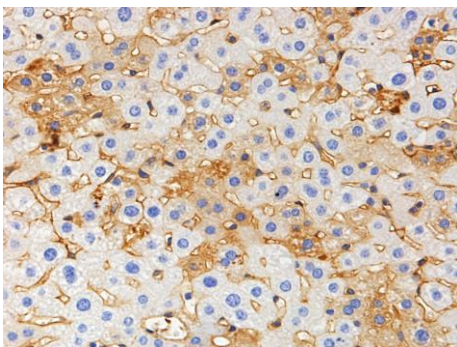

Test 1

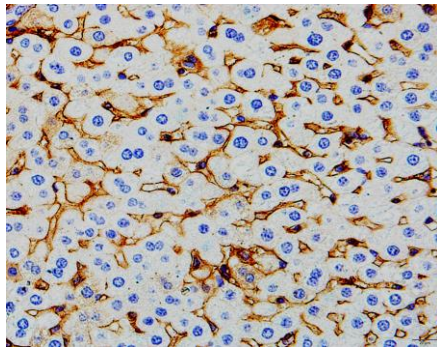

Test 2

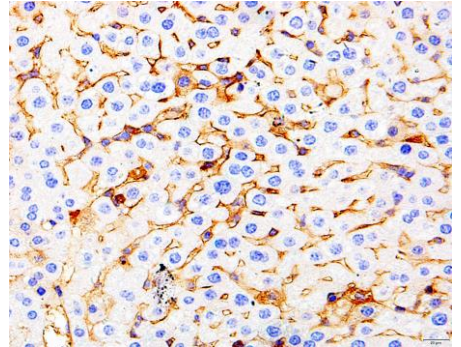

Test 3

---

**Liver tissue for 7 days infection**

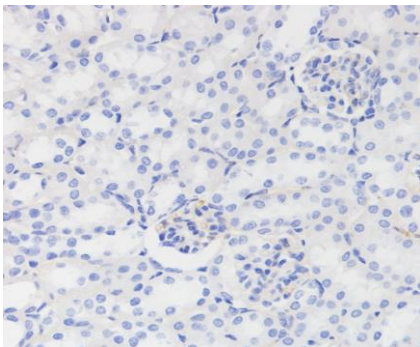

Test 1

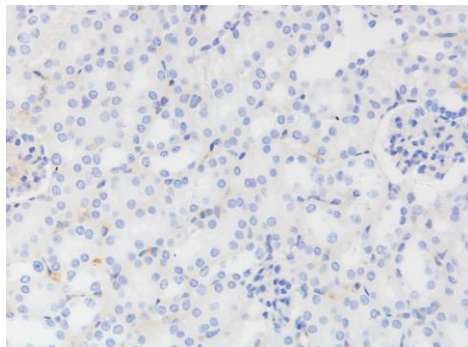

Test 2

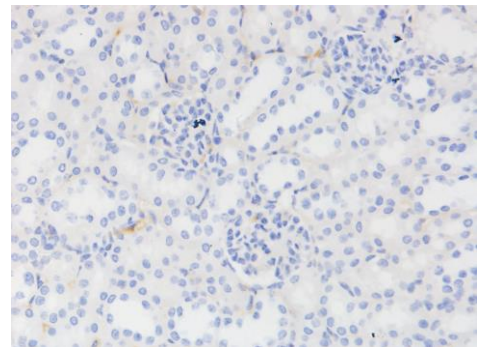

Test 3

---

**Normal kidney tissue**

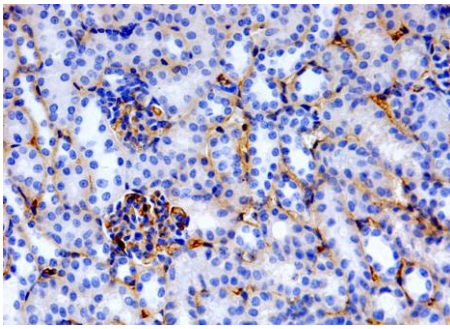

Test 1

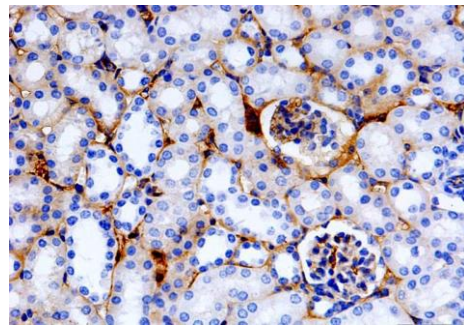

Test 2

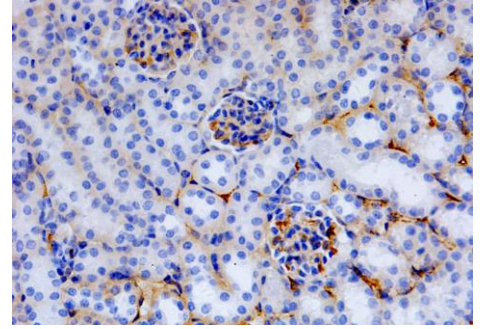

Test 3

---

**Kidney tissue for 3 days infection**

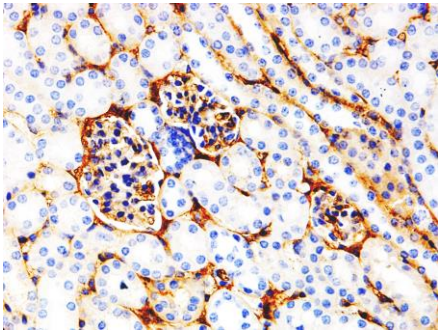

Test 1

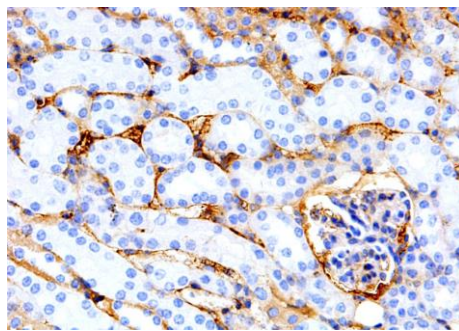

Test 2

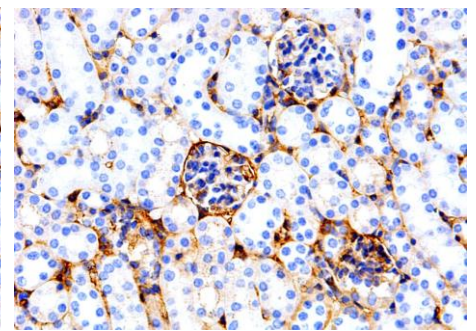

Test 3

---

**Kidney tissue for 5 days infection**

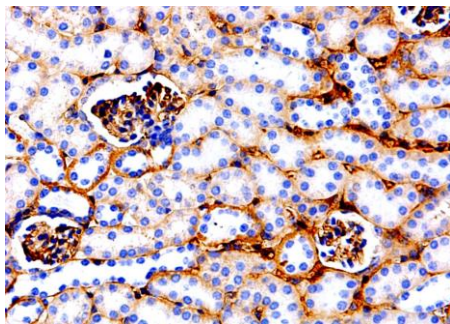

Test 1

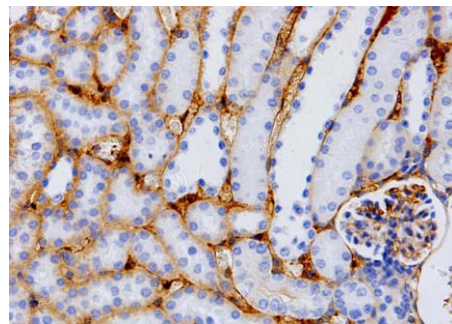

Test 2

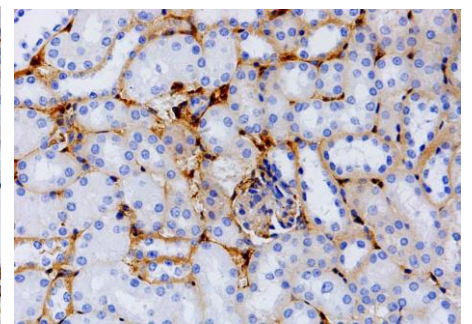

Test 3

---

**Kidney tissue for 7 days infection**

**The image data of Ly6G<sup>+</sup> neutrophils infiltration**

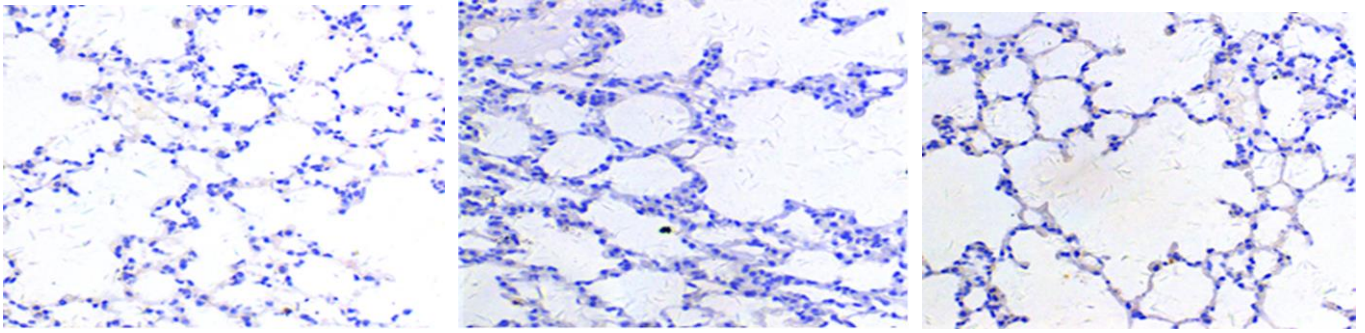

Test 1

Test 2

Test 3

---

**Normal lung tissue**

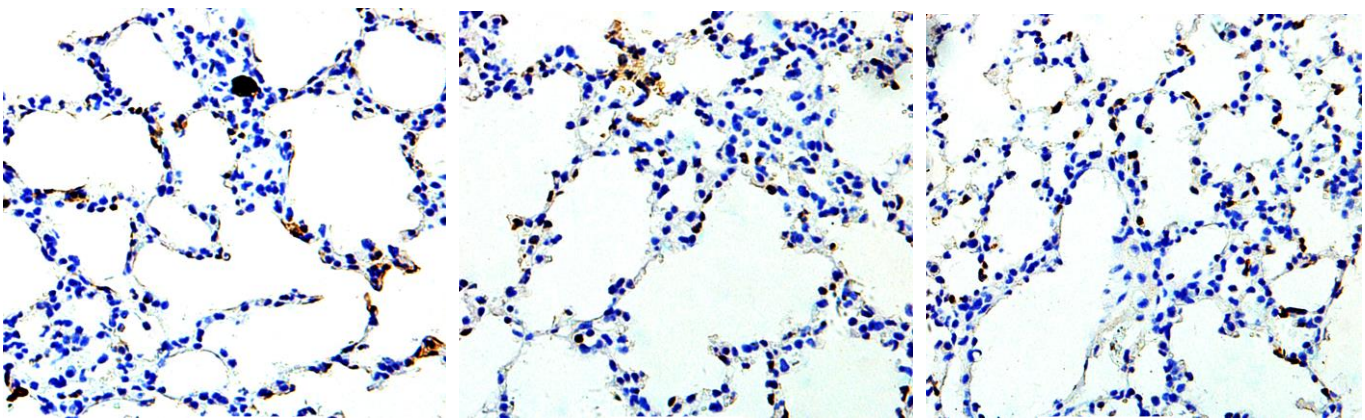

Test 1

Test 2

Test 3

---

**Lung tissue for 3 days infection**

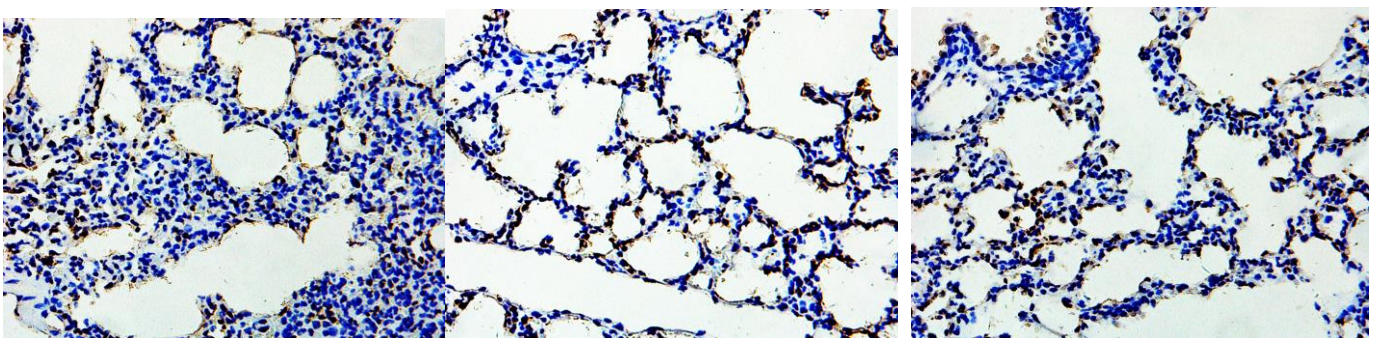

Test 1

Test 2

Test 3

---

**Lung tissue for 5 days infection**

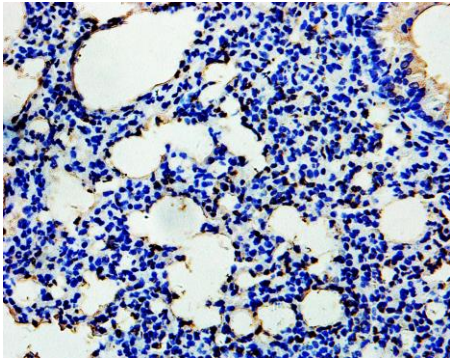

Test 1

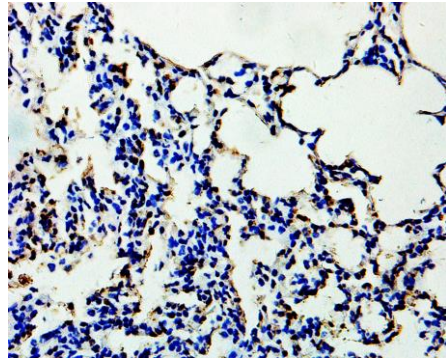

Test 2

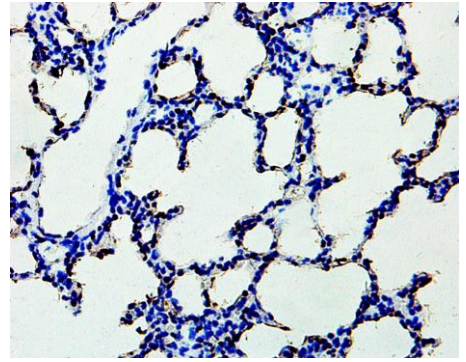

Test 3

---

**Lung tissue for 7 days infection**

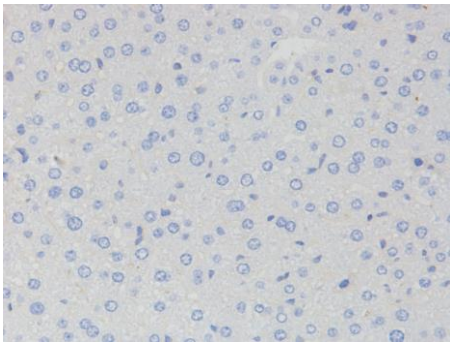

Test 1

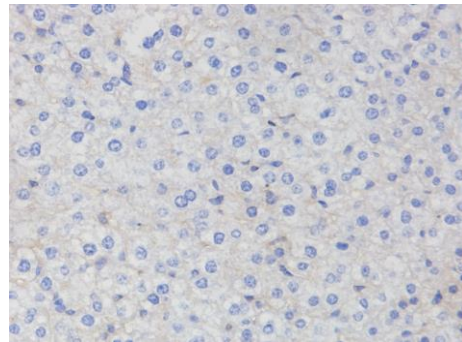

Test 2

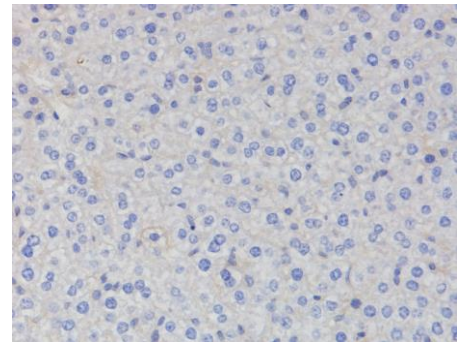

Test 3

---

**Normal liver tissue**

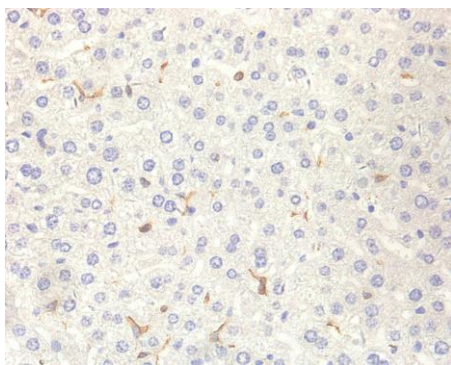

Test 1

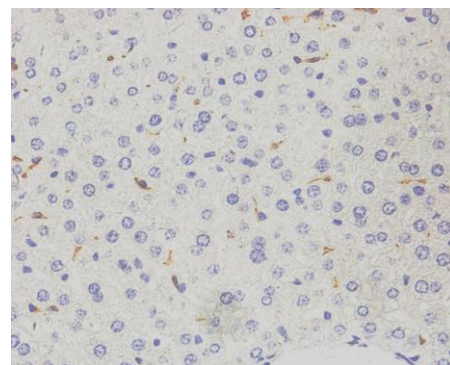

Test 2

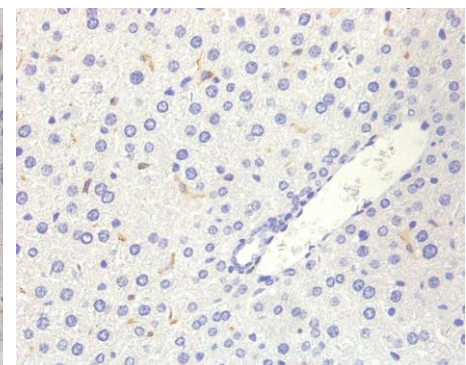

Test 3

---

**Liver tissue for 3 days infection**

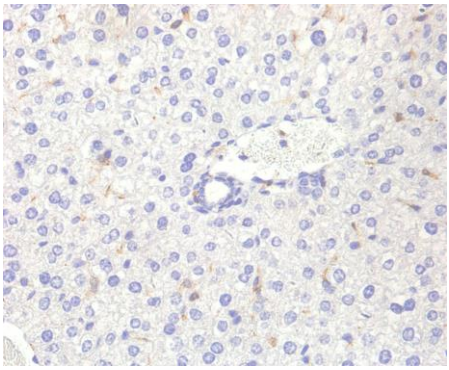

Test 1

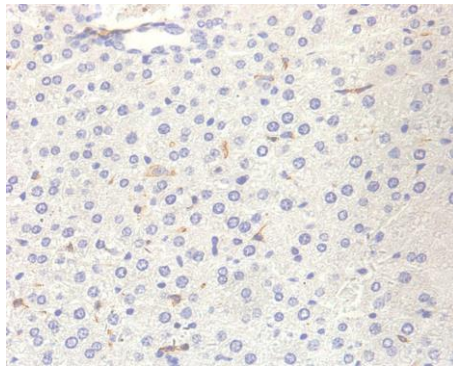

Test 2

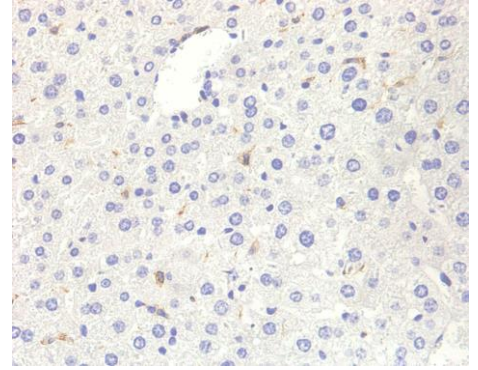

Test 3

---

**Liver tissue for 5 days infection**

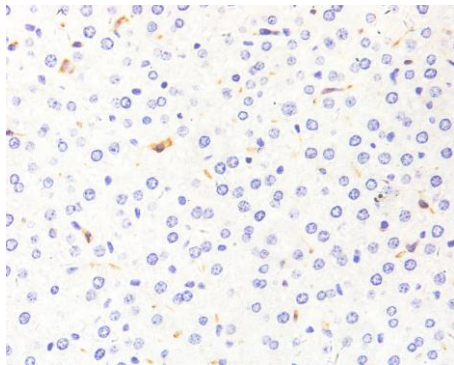

Test 1

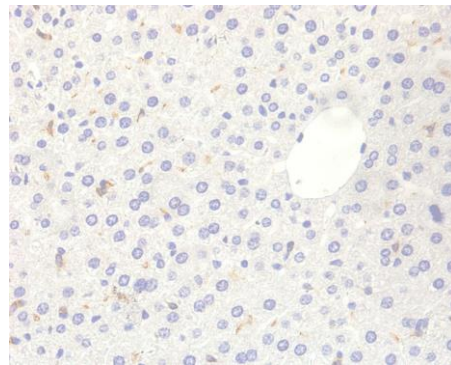

Test 2

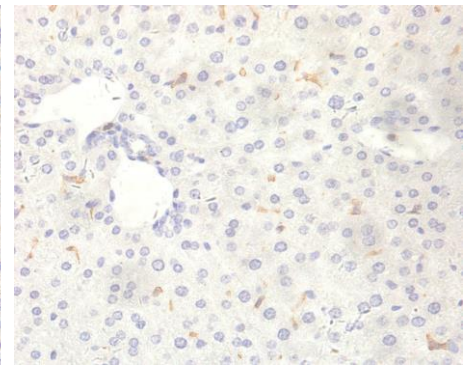

Test 3

---

**Liver tissue for 7 days infection**

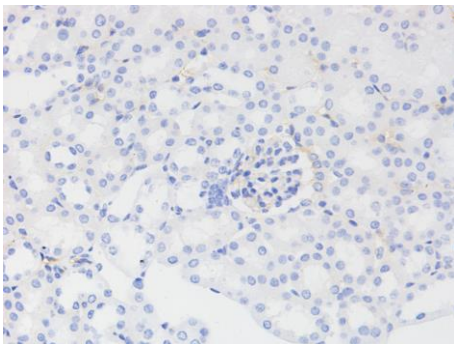

Test 1

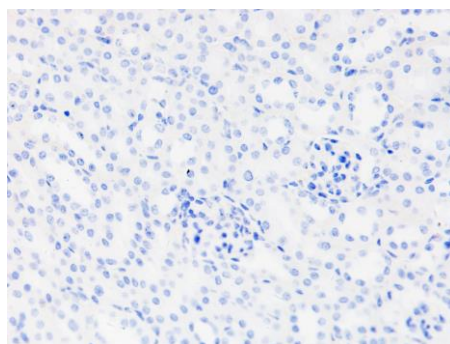

Test 2

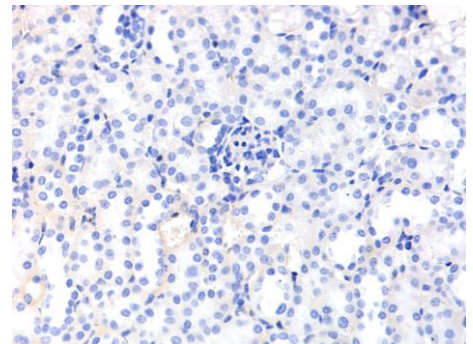

Test 2

---

**Normal kidney tissue**

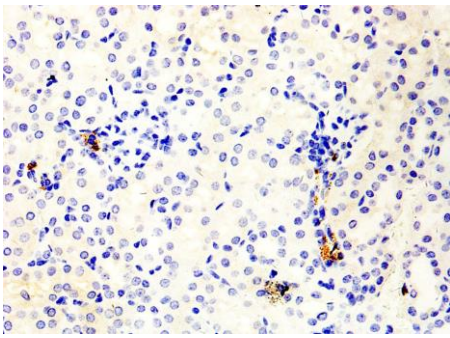

Test 1

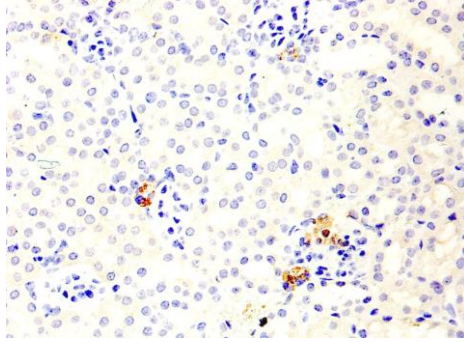

Test 2

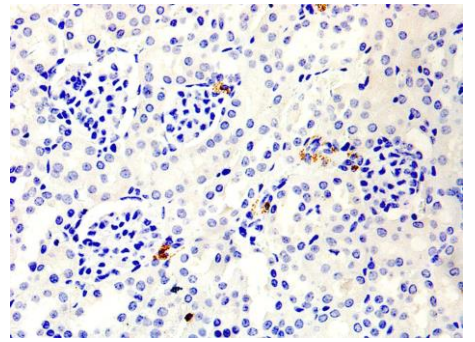

Test 3

---

**Kidney tissue for 3 days infection**

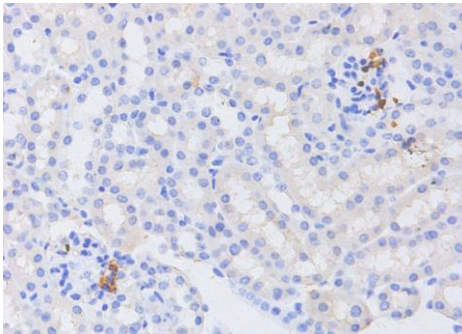

Test 1

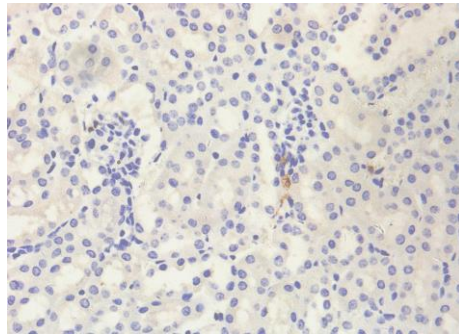

Test 2

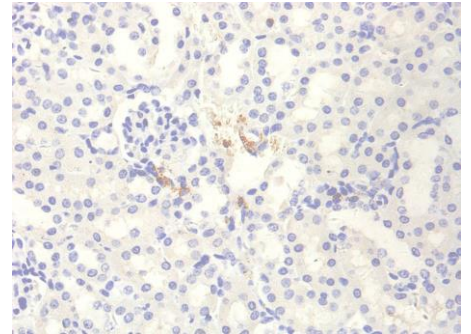

Test 3

---

**Kidney tissue for 5 days infection**

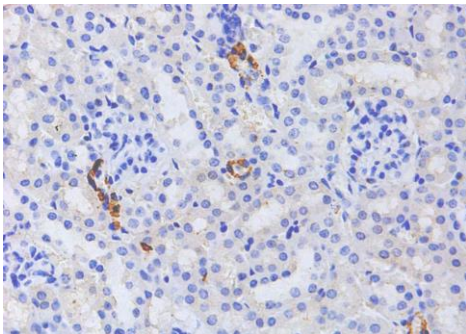

Test 1

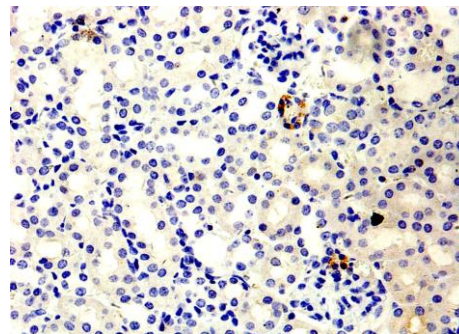

Test 2

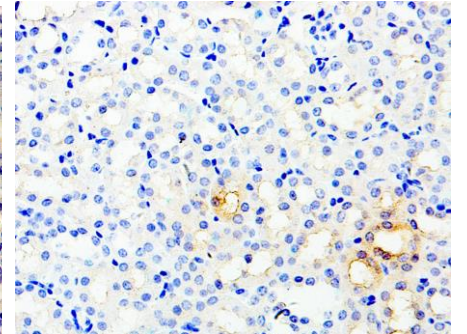

Test 3

---

**Kidney tissue for 7 days infection**
